# Supplementary material for: C-type lectin receptor CLEC4A2 promotes tissue adaptation of macrophages and protects against atherosclerosis
Source: PubMed Central journal article supplement (PMC8752790; doi:10.1038/s41467-021-27862-9), 2022-01-11
Supplement: 41467_2021_27862_MOESM3_ESM.pdf [file 41467_2021_27862_MOESM3_ESM.pdf]

## Description of Additional Supplementary Files

File name: Supplementary Data 1

Description: A list of differentially expressed genes ( $P < 0.05$ ) in 13 clusters of myeloid cells from the aortas of *ApoE*<sup>-/-</sup> mice by single cell RNA sequencing (related to Figure 1). Differentially expressed genes were identified using the two-sided Wilcoxon Rank Sum test with Bonferroni's correction for multiple hypothesis testing.

File name: Supplementary Data 2

Description: A list of inflammatory genes related to Supplementary Figure 2c.

File name: Supplementary Data 3

Description: A list of differentially expressed genes ( $P < 0.05$ ) in *Clec4a2*-deficient BMDMs relative to WT cells by RNA sequencing (related to Figure 5). Differential expression was assessed using the two-sided Robinson and Smyth exact test with Bonferroni's correction for multiple hypothesis testing.

File name: Supplementary Data 4

Description: A list of differentially expressed genes ( $P < 0.05$ ) in 13 clusters of myeloid cells from the aortas of *ApoE*<sup>-/-</sup> and *ApoE*<sup>-/-</sup> *Clec4a2*<sup>-/-</sup> littermate mice by single cell RNA sequencing (related to Figure 7). Differentially expressed genes were identified using the two-sided Wilcoxon Rank Sum test with Bonferroni's correction for multiple hypothesis testing.

File name: Supplementary Data 5

Description: A list of differentially expressed genes ( $P < 0.05$ ) in vascular resident macrophages (Cluster 1) of *ApoE*<sup>-/-</sup> *Clec4a2*<sup>-/-</sup> mice relative to *ApoE*<sup>-/-</sup> mice by single cell RNA sequencing (related to Figure 7). Differentially expressed genes were identified using the two-sided Wilcoxon Rank Sum test with Bonferroni's correction for multiple hypothesis testing.
